# Supplementary material
Source: PubMed Central journal article supplement (PMC2063476)
Supplement: 7601867s1.pdf [file 7601867s1.pdf]

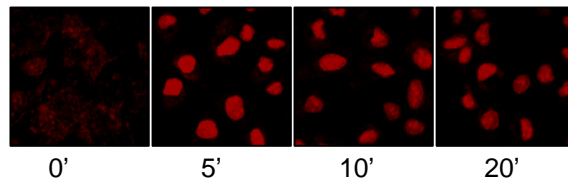

**Supplementary Figure S1** Bacteria stimulate rapid epithelial ROS generation as detected by oxidation of DHE. IEC-6 cells were colonized with *Lactobacillus* (MOI=3) washed, and incubated with 5  $\mu$ M of DHE. Fluorescence was measured by confocal laser scanning microscopy (Zeiss).

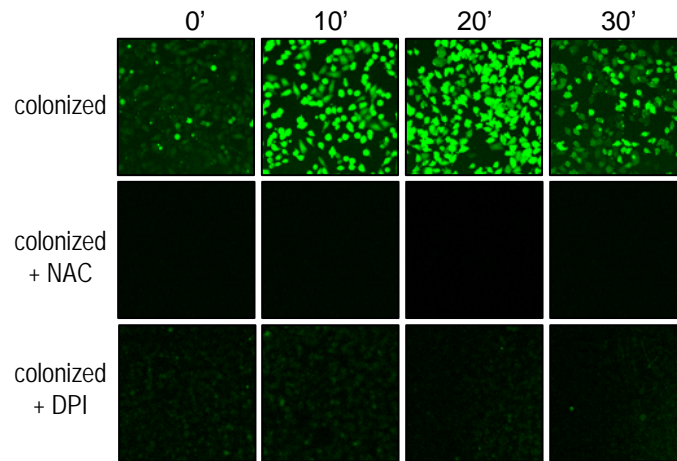

**Supplementary Figure S2** DPI and NAC prevent bacterially mediated epithelial ROS generation. HeLa cells pretreated with NAC or DPI for 30 min were colonized with *Lactobacillus* (MOI=3) washed, and incubated with 5  $\mu$ M of CM-H<sub>2</sub>DCF-DA. Fluorescence was measured by confocal laser scanning microscopy (Zeiss).

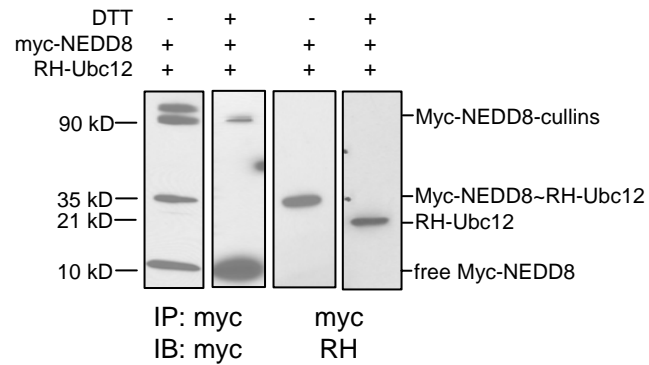

**Supplementary Figure S3** Confirmation of the NEDD8~Ubc12 thioester intermediate. Immunoprecipitation of myc-NEDD8 with anti-myc agarose and immunoblots with myc- and RH-specific antisera under non-reducing and reducing conditions of lysates from HeLa cells co-transfected with Myc-NEDD8 and RH-Ubc12.
